# Supplementary figures and images for: Doses of Insulin and Its Analogues and Cancer Occurrence in Insulin-Treated Type 2 Diabetic Patients
Source: Oxford University Press journal article supplement (doi:10.2337/dc10-0476), 2010-06-14

Figure A-1

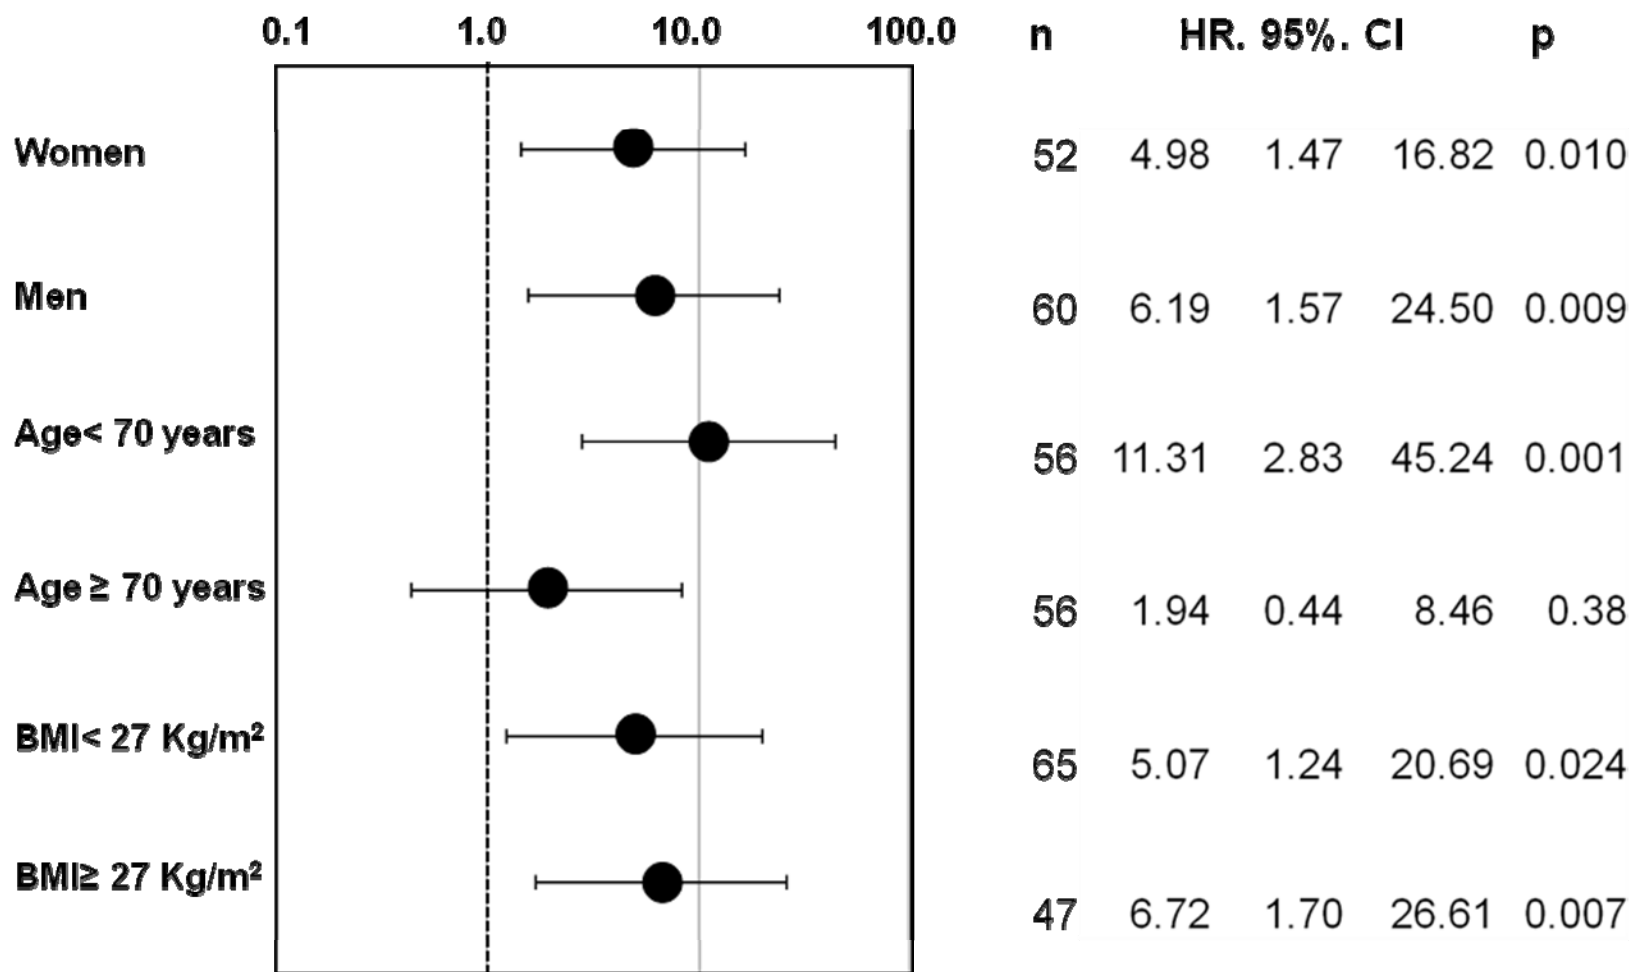

Supplement: dc100476onlineappendix.pdf [file dc100476onlineappendix.pdf]
